# Supplementary material for: Magmatic sulfides in high-potassium calc-alkaline to shoshonitic and alkaline rocks
Source: Copernicus journal article supplement (doi:10.5194/se-11-1-2020), 2020-01-07
Supplement: Supplementary file 1 [file se-11-1-2020-supplement.zip]

Archive with 3 entries (3 files):
- se-11-1-2020-supplement-title-page.pdf
- Supplementary 2_Corrected Revised version.pdf
- Supplementary 1.xlsx
