# Supplementary material for: Magmatic sulfides in high-potassium calc-alkaline to shoshonitic and alkaline rocks
Source: Copernicus journal article supplement (doi:10.5194/se-11-1-2020), 2020-01-07
Supplement: Supplementary file 1 [file se-11-1-2020-supplement.zip › se-11-1-2020-supplement-title-page.pdf]

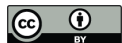

## *Supplement of*

# **Magmatic sulfides in high-potassium calc-alkaline to shoshonitic and alkaline rocks**

**Ariadni A. Georgatou and Massimo Chiaradia**

*Correspondence to:* Ariadni A. Georgatou (ariadni.georgatou@unige.ch)

- se-11-1-2020-supplement-title-page.pdf
- Supplementary 1.xlsx
- Supplementary 2\_Corrected Revised version.pdf

The copyright of individual parts of the supplement might differ from the CC BY 4.0 License.
