# Supplementary material for: Magmatic sulfides in high-potassium calc-alkaline to shoshonitic and alkaline rocks
Source: Copernicus journal article supplement (doi:10.5194/se-11-1-2020), 2020-01-07
Supplement: Supplementary file 1 [file se-11-1-2020-supplement.zip › Supplementary 1.xlsx]

## Sheet: Table S1
Area	Sample N	Sampling Reference	Lat (DD)	Lon (DD)	Lab section N	WR Chem Major XRF	WR Chem Trace	Sulphide Occurence	SEM	EPMA
Kula	LP-16-001	Luca Paolilo	38.5717	28.6152	25398	√	XRF	√	√	√
Kula	LP-16-002	Luca Paolilo	38.5717	28.6152
Kula	LP-16-003	Luca Paolilo	38.5706	28.6498
Kula	LP-16-004	Luca Paolilo	38.5687	28.6717	25389	√	XRF	√	√	√
Kula	LP-16-005	Luca Paolilo	38.5727	28.6792	25390	√	XRF	√
Kula	LP-16-006	Luca Paolilo	38.5704	28.6696	25391	√	XRF	√	√	√
Kula	LP-16-007	Luca Paolilo	38.5704	28.6696				√
Kula	LP-16-008	Luca Paolilo	38.5704	28.6696
Kula	LP-16-009	Luca Paolilo	38.5644	28.6592
Kula	LP-16-010	Luca Paolilo	38.5644	28.6592
Kula	LP-16-011	Luca Paolilo	38.5662	28.6626
Kula	LP-16-012	Luca Paolilo	38.5762	28.5475
Kula	LP-16-013	Luca Paolilo	38.5778	28.5535	25392	√	XRF	√
Kula	LP-16-014	Luca Paolilo	38.5784	28.5576
Kula	LP-16-015	Luca Paolilo	38.5971	28.5699
Kula	LP-16-016	Luca Paolilo	38.5971	28.5699
Kula	LP-16-017	Luca Paolilo	38.5971	28.5699	25393	√	XRF	√		√
Kula	LP-16-018	Luca Paolilo	38.611	28.5389	25394	√	XRF	√	√	√
Kula	LP-16-019	Luca Paolilo	38.6184	28.5342	25395	√	XRF	√	√	√
Kula	LP-16-020	Luca Paolilo	38.6184	28.5342
Kula	LP-16-056 Α	Luca Paolilo	38.6092	28.4291	25396	√	XRF	√
Kula	LP-16-056 Β	Luca Paolilo	38.6092	28.4291	25397	√	XRF	√		√
Kula	LP-16-057	Luca Paolilo	38.6209	28.3736
Beydagi	LP-16-021	Luca Paolilo	38.5093	29.1243
Beydagi	LP-16-022	Luca Paolilo	38.5093	29.1243
Beydagi	LP-16-023	Luca Paolilo	38.5093	29.1243	24979
Beydagi	LP-16-024	Luca Paolilo	38.5093	29.1243
Beydagi	LP-16-025	Luca Paolilo	38.5093	29.1243	24980		LASER
Beydagi	LP-16-026 A	Luca Paolilo	38.5093	29.1243	24728		LASER	0
Beydagi	LP-16-026 B	Luca Paolilo	38.5093	29.1243	24729		LASER	0
Beydagi	LP-16-027	Luca Paolilo	38.5093	29.1243	24727	√	LASER	0
Beydagi	LP-16-032	Luca Paolilo	38.4714	29.1511		√	LASER
Beydagi	LP-16-033 A	Luca Paolilo	38.3381	29.1511	24722			0
Beydagi	LP-16-033 B	Luca Paolilo	38.3381	29.1511	24723
Beydagi	LP-16-034	Luca Paolilo	38.3381	29.1511
Beydagi	LP-16-035	Luca Paolilo	38.483	29.1682	24732	√	LASER	√
Beydagi	LP-16-036 A	Luca Paolilo	38.4511	29.1048	24720	√	LASER	√		√
Beydagi	LP-16-036 B	Luca Paolilo	38.4511	29.1048	24721
Beydagi	LP-16-047	Luca Paolilo	38.4759	29.1749
Beydagi	LP-16-048	Luca Paolilo	38.4759	29.1749
Beydagi	LP-16-049 A	Luca Paolilo	38.4759	29.1749	24738			√
Beydagi	LP-16-049 B	Luca Paolilo	38.4759	29.1749	24739			√		√
Beydagi	LP-16-050	Luca Paolilo	38.429	29.1186	24731	√	LASER	√
Beydagi	LP-16-051	Luca Paolilo	38.483	29.1682	24733	√	LASER	√
Beydagi	LP-16-052 B	Luca Paolilo	38.4415	29.1511	24724	√	LASER	√
Beydagi	LP-16-052 B2	Luca Paolilo	38.4415	29.1511	24735			√		√
Beydagi	LP-16-052 C	Luca Paolilo	38.4415	29.1511	24730			√
Beydagi	LP-16-053	Luca Paolilo	38.5089	29.1032	24743			√
Beydagi	LP-16-054 A	Luca Paolilo	38.5027	29.1065	24725			√
Beydagi	LP-16-054 B	Luca Paolilo	38.5027	29.1065	24726			0
Elmadag	FF-16-001	Florian Franziskakis	38.8235	29.2908	25127	√	XRF/LASER	√
Elmadag	FF-16-002	Florian Franziskakis	38.8216	29.3	25128	√	XRF/LASER
Elmadag	FF-16-003	Florian Franziskakis	38.8217	29.3	25129	√	XRF/LASER
Elmadag	FF-16-017	Florian Franziskakis	38.5986	29.2708		√	XRF/LASER
Elmadag	FF-16-018	Florian Franziskakis	38.8476	29.5475	25123	√	XRF/LASER	√		√
Elmadag	FF-16-020	Florian Franziskakis	38.81	29.5379		√	XRF/LASER
Elmadag	FF-16-022	Florian Franziskakis	38.7697	29.4609	25134	√	XRF/LASER
Elmadag	FF-16-027	Florian Franziskakis	38.7133	29.5149	25118	√	XRF/LASER	0
Elmadag	FF-16-033	Florian Franziskakis	38.8351	29.5033	25136	√	XRF/LASER
Elmadag	FF-16-034	Florian Franziskakis	38.8291	29.487	25115	√	XRF/LASER	0
Elmadag	FF-16-026	Florian Franziskakis	38.8448	29.4254	25119			0
Itecektepe	FF-16-006	Florian Franziskakis	38.6347	29.2767	25126	√	XRF/LASER	√		√
Itecektepe	FF-16-008	Florian Franziskakis	38.6305	29.2728	25132	√	XRF/LASER
Itecektepe	FF-16-010	Florian Franziskakis	38.6305	29.2728		√	XRF/LASER
Itecektepe	FF-16-011	Florian Franziskakis	38.6271	29.2617		√	XRF/LASER
Itecektepe	FF-16-012	Florian Franziskakis	38.6288	29.2708		√	XRF/LASER
Itecektepe	FF-16-015	Florian Franziskakis	38.6288	29.2708		√	XRF/LASER
Itecektepe	FF-16-016	Florian Franziskakis	38.5985	29.2707	25124	√	XRF/LASER	√		√
Itecektepe	FF-16-023	Florian Franziskakis	38.4464	29.0961	25122	√	XRF/LASER	√
Itecektepe	FF-16-024	Florian Franziskakis	38.587	29.2153	25121	√	XRF/LASER	√		√
Itecektepe	FF-16-025	Florian Franziskakis	38.5804	29.2281	25120	√	XRF/LASER	√		√
Konya	BP-16-001	Bastien Deriaz & Pablo Lormand	37.9425	32.3601	24762	√	XRF/LASER	0
Konya	BP-16-002	Bastien Deriaz & Pablo Lormand	37.9425	32.3601
Konya	BP-16-003	Bastien Deriaz & Pablo Lormand	37.9154	32.3921	24763	√	XRF/LASER	0
Konya	BP-16-004	Bastien Deriaz & Pablo Lormand	37.909	32.3921	24764	√	XRF/LASER	√		√
Konya	BP-16-005	Bastien Deriaz & Pablo Lormand	37.909	32.3921		√
Konya	BP-16-006	Bastien Deriaz & Pablo Lormand	37.909	32.3921		√
Konya	BP-16-007	Bastien Deriaz & Pablo Lormand	37.7614	32.1792	24765	√	XRF/LASER	√	√	√
Konya	BP-16-008	Bastien Deriaz & Pablo Lormand	37.7614	32.1792	24766	√	XRF/LASER	√
Konya	BP-16-009	Bastien Deriaz & Pablo Lormand	37.7573	32.0853
Konya	BP-16-010	Bastien Deriaz & Pablo Lormand	37.7573	32.0853
Konya	BP-16-011	Bastien Deriaz & Pablo Lormand	37.8383	31.9554	24767
Konya	BP-16-012	Bastien Deriaz & Pablo Lormand	37.8383	31.9554	24768
Konya	BP-16-013	Bastien Deriaz & Pablo Lormand	37.8383	31.9554
Konya	BP-16-014	Bastien Deriaz & Pablo Lormand	37.8383	31.9554
Konya	BP-16-015	Bastien Deriaz & Pablo Lormand	37.8177	32.0127		√	XRF/LASER	√
Konya	BP-16-016	Bastien Deriaz & Pablo Lormand	37.8177	32.0127	24769	√	XRF/LASER
Konya	BP-16-017	Bastien Deriaz & Pablo Lormand	37.8228	31.9456	24770	√	XRF/LASER
Konya	BP-16-018	Bastien Deriaz & Pablo Lormand	37.81	31.9498	24771			√
Konya	BP-16-019	Bastien Deriaz & Pablo Lormand	37.81	31.9498	24772	√	XRF/LASER
Konya	BP-16-020	Bastien Deriaz & Pablo Lormand	37.7496	32.0694	24773	√	XRF/LASER	√
Konya	BP-16-021	Bastien Deriaz & Pablo Lormand	37.757	32.0858	24774		XRF/LASER	√
Konya	BP-16-022	Bastien Deriaz & Pablo Lormand	37.7573	32.0853	24775			√
Konya	BP-16-023	Bastien Deriaz & Pablo Lormand	37.7961	32.1868	24776	√	XRF/LASER	√
Konya	BP-16-024	Bastien Deriaz & Pablo Lormand	37.685	31.9126	24777	√	XRF/LASER	√
Konya	BP-16-025	Bastien Deriaz & Pablo Lormand	37.6572	31.9012	24778	√	XRF/LASER	√		√
Konya	BP-16-026 a	Bastien Deriaz & Pablo Lormand	37.6668	31.8508	24779	√	XRF/LASER	0
Konya	BP-16-026 b	Bastien Deriaz & Pablo Lormand	37.6668	31.8508	24780	√	XRF/LASER	0
Konya	BP-16-027	Bastien Deriaz & Pablo Lormand	37.7159	31.86	24781	√	XRF/LASER	√
Konya	BP-16-028	Bastien Deriaz & Pablo Lormand	37.5355	31.8891	24782			√
Konya	BP-16-029	Bastien Deriaz & Pablo Lormand	37.7573	32.0853	24783
Konya	BP-16-030 a	Bastien Deriaz & Pablo Lormand	37.6583	31.9619	24784	√	XRF/LASER	√
Konya	BP-16-030 b	Bastien Deriaz & Pablo Lormand	37.6583	31.9619	24785	√	XRF/LASER	√
Konya	BP-16-031	Bastien Deriaz & Pablo Lormand	37.5066	31.9145	24786	√	XRF/LASER	0
Konya	BP-16-032	Bastien Deriaz & Pablo Lormand	37.5066	31.9145	24787	√	XRF/LASER	0
Konya	BP-16-033	Bastien Deriaz & Pablo Lormand	37.5292	31.9434	24788	√	XRF/LASER	√
Konya	BP-16-034	Bastien Deriaz & Pablo Lormand	37.5292	31.9434	24789	√	XRF/LASER	0
Konya	BP-16-035	Bastien Deriaz & Pablo Lormand	37.5292	31.9434
Konya	BP-16-036	Bastien Deriaz & Pablo Lormand	37.5241	32.0148		√	XRF/LASER
Konya	BP-16-037	Bastien Deriaz & Pablo Lormand	37.5278	32.0666	24791	√	XRF/LASER	√	√	√
Konya	BP-16-038	Bastien Deriaz & Pablo Lormand	37.5278	32.081	24792			0
Konya	BP-16-039	Bastien Deriaz & Pablo Lormand	37.5259	32.112	24793	√	XRF/LASER	0
Konya	BP-16-040	Bastien Deriaz & Pablo Lormand	37.567	32.3017	24794	√	XRF/LASER	0
Konya	BP-16-041	Bastien Deriaz & Pablo Lormand	37.5065	32.2165	24795	√	XRF/LASER	√
Konya	BP-16-042	Bastien Deriaz & Pablo Lormand	37.9004	31.9272	24798	√	XRF/LASER	√
Konya	BP-16-043 a	Bastien Deriaz & Pablo Lormand	37.8431	31.9185	24796	√	XRF/LASER	√
Konya	BP-16-043 b	Bastien Deriaz & Pablo Lormand	37.8431	31.9185	24797	√	XRF/LASER	√
Konya	BP-16-044	Bastien Deriaz & Pablo Lormand	37.8207	31.9357	24799	√	XRF/LASER	√
Konya	BP-16-045	Bastien Deriaz & Pablo Lormand	37.8029	31.9768	24800	√	LASER
Konya	BP-16-046	Bastien Deriaz & Pablo Lormand	37.8177	32.0127	24801			√
Konya	BP-16-047	Bastien Deriaz & Pablo Lormand	37.8291	31.9851	24802	√	LASER
Konya	BP-16-048	Bastien Deriaz & Pablo Lormand	37.8198	32.0285	24803	√	LASER	√
Konya	BP-16-049	Bastien Deriaz & Pablo Lormand	37.6947	32.0505	24804	√	LASER	√
Konya	BP-16-050	Bastien Deriaz & Pablo Lormand	37.6848	32.0608	24805	√	LASER	0
Konya	BP-16-051 a	Bastien Deriaz & Pablo Lormand	37.6683	32.0629	24806	√	LASER	0
Konya	BP-16-051 b	Bastien Deriaz & Pablo Lormand	37.6683	32.0629	24807	√	LASER	0
Konya	BP-16-052	Bastien Deriaz & Pablo Lormand	37.529	32.0011	24808	√	LASER	√
Konya	BP-16-053	Bastien Deriaz & Pablo Lormand	37.529	32.0011	24809			√
Konya	BP-16-054	Bastien Deriaz & Pablo Lormand	37.5361	32.0151	24810	√	LASER	0
Konya	BP-16-055	Bastien Deriaz & Pablo Lormand	37.5361	32.0151	24811			√
Konya	BP-16-056	Bastien Deriaz & Pablo Lormand	37.5186	32.0204	24812			√
Konya	BP-16-057	Bastien Deriaz & Pablo Lormand	37.53	32.0576	24813	√	LASER	0
Konya	BP-16-058	Bastien Deriaz & Pablo Lormand	37.5692	32.0468	24814			0
Konya	BP-16-059	Bastien Deriaz & Pablo Lormand	37.404	32.1395	24815	√	LASER	√
Konya	BP-16-060	Bastien Deriaz & Pablo Lormand	37.4279	32.06	24816	√	LASER	√
Konya	BP-16-061	Bastien Deriaz & Pablo Lormand	37.4293	32.0603	24817	√	LASER	√
Konya	BP-16-062	Bastien Deriaz & Pablo Lormand	37.4293	32.0603	24818	√	LASER	√
Konya	BP-16-063	Bastien Deriaz & Pablo Lormand	37.4486	32.0894	24819	√	LASER	√
Konya	BP-16-064	Bastien Deriaz & Pablo Lormand	37.4654	32.0924	24820	√	LASER	√
Konya	BP-16-065	Bastien Deriaz & Pablo Lormand	37.4645	32.0966	24821	√	LASER	√		√
Konya	BP-16-066	Bastien Deriaz & Pablo Lormand	37.4802	32.079	24822	√	LASER	√
Konya	BP-16-067 a	Bastien Deriaz & Pablo Lormand	37.7862	32.1941	24823	√	XRF	√
Konya	BP-16-067 b	Bastien Deriaz & Pablo Lormand	37.7862	32.1941	24824	√	XRF	√	√	√
Konya	BP-16-068	Bastien Deriaz & Pablo Lormand	37.5736	31.9686	24825			0
